# Supplementary material
Source: PubMed Central journal article supplement (PMC4435481)
Supplement: mt2014102x10.pdf [file mt2014102x10.pdf]

**Table S1: List of primer pairs sequences.**

| Genes                                                      | Forward Sequence (5' to 3') | Reverse Sequence (5' to 3') |
|------------------------------------------------------------|-----------------------------|-----------------------------|
| ADAM metallopeptidase domain 9 (ADAM9)                     | GGACGGAACCAGACTGCTG         | CCACTGAACAAAGTTGCCCA        |
| Adiponectin (ADIPOQ)                                       | AGCCGCTTATATGTATCGCTCA      | TGCCGTCATAATGATTCTGTTGG     |
| AKT1                                                       | CCAAGGCCCAACACCTTTTATC      | TTCTGCCTCTTGAGTCCATC        |
| ANGPT1                                                     | TGCACTAAAGAAGGTGTTTTGCT     | CCTCCCCATTACATCCATATT       |
| ANGPT2                                                     | CGAGGCGCATTTCGCTGTAT        | GGCTATGACTACTTATTTTGCCC     |
| ANGPTL4                                                    | TCCAACGCCACCCACTTAC         | TGAAGTCATCTCACAGTTGACCA     |
| CCL2                                                       | TTAAAAACCTGGATCGGAACCAA     | GCATTAGCTTCAGATTACGGGT      |
| CCL11                                                      | GAATCACCACAACAGATGCAC       | ATCCTGGACCCACTTCTTCTT       |
| Cyclin-dependent kinase 4 (CDK4)                           | CCAATGTTGTACGGTGTATGG       | TGTCCAGGTATGCTCCAGGT        |
| Cyclin-dependent kinase inhibitor 2B (CDKN2B)              | CCCTGCCACCCTTACCAGA         | CAGATACCTCGCAATGTCACG       |
| cystatin A (CSTA)                                          | TACGGAGGTGTTTCAGAGGGC       | CAGCGACGGCTTGAGTTTT         |
| CXCL1                                                      | CTGGGATTCACCTCAAGAACATC     | CAGGGTCAAGGCAAGCCTC         |
| CXCL5                                                      | TGCGTTGTGTTTGGCTTAACCG      | AGCTATGACTTCCACCCTAGG       |
| CXCL9                                                      | GAACGGAGATCAAACCTGCCT       | TGTAGTCTTCTTGAACGACGA       |
| CXCL10                                                     | CCAAGTGCTGCCGTCATTTTC       | GGCTCGCAGGGATGATTTCAA       |
| Epidermal growth factor receptor (EGFR)                    | GGGAGCATTGGCACAGTGTA        | GCCATCACATAGGCTTCGTCAA      |
| EPHA3                                                      | TTCTGGTCGGGAGGTTTTGTG       | ACTGTGTAGTAGGGTCTTGA        |
| EPHB3                                                      | ACCGTAAGAGACTGTAACAGCA      | GTCCACTTTCACGTAGGGGTT       |
| Fatty acid synthase (FAS)                                  | AGAGATCCCGAGACGCTTCT        | GCCTGGTAGGCATTCTGTAGT       |
| Fibroblast growth factor 1 (FGF1)                          | CAGCTCAGTGGGAAAAGTG         | TGTCTGCGAGCCGTATAAAAAG      |
| FGF2                                                       | GCGACCCACACGTCAAAATA        | TCCATCTTCTTCATAGCAAAGT      |
| FBJ osteosarcoma oncogene B (FOSB)                         | GCCACTGCGGACCAAAATTC        | TTATTGGCGACAGTCCAGAACC      |
| Fos related antigen 2 (FRA2)                               | AGCCTCCCGAAGAGGACAG         | AGGACATTGGGGTAGGTGAA        |
| Growth differentiation factor 3 (GDF3)                     | TAAGGTGGGCAGATTGCTTTTT      | CTGGACAGTTACCCTGGAGTA       |
| GLI-Kruppel family member GLI1 (GLI1)                      | GAGCCCTTCTTTAGGATTCCCA      | ACCCCGAGTAGAGTCATGTGG       |
| GM-CSF                                                     | TCGTCTCTAACGAGTTCTCCTT      | GCAGTATGCTGTAGTAGCTGG       |
| Hepatocyte growth factor (HGF)                             | CTGCTTCATGTCGCCATCC         | TGGGTCTTCTTGGTAAGAGTAG      |
| HIF1 $\alpha$                                              | GGTCATCGCAGTTGGAACCTCC      | CGCTTGTGTCTTGGAAAGGCTTG     |
| Baculoviral IAP repeat-containing 2 (IAP2)                 | AGGGACCAACAAGGGCACAG        | TTTGTGTGTTTGGCGGTGTCTC      |
| Insulin-like growth factor binding protein 4 (IGFBP4)      | AGAAGCCCTTCAGGTACATTG       | TGTCCTCCACGATCTTCATCTT      |
| IL1R1                                                      | GCCAAGGTGGAGGACTCAG         | CCAGGGTCATTCTTAAACACAGT     |
| IL-6                                                       | TAGTCCTTCTACCCAAATTCC       | TTGGTCTTACGACTCCTTCC        |
| IL-10                                                      | AGAAGCATGGCCAGAAATCA        | GGCCTTGTAGACACTTGGT         |
| IL-18                                                      | GTGAACCCAGACCAGACTG         | CCTGGAACACTGTTCTGAAAGA      |
| Inhibin, beta A (INHBA)                                    | ATAGAGGACGACATTGGCAGG       | ATAGAGGACGACATTGGCAGG       |
| Integrin, alpha V (ITGAV)                                  | CCTGTGCTCCATTGTACCACT       | AGCATACTAACGGTCTTTGTG       |
| Jun B proto-oncogene (JUN-B)                               | GACCTGCACAAGATGAACCAC       | AGGCTGGAGAGTAACCTGCTGA      |
| Keratinocyte growth factor (KGF)                           | CCGTGGCAGTTGGAATTGTG        | CCTCCGCTGTGTGTCCATTT        |
| Kl67                                                       | CTGCCTCAGATGGCTCAAAGA       | GAAGACTTCGGTTCCTGTAAAC      |
| Kruppel-like factor 9 (KLF9)                               | GCCGCTACATGGACTTCG          | GCCGTTACCTGTATGCAC          |
| Mitogen-activated protein kinase 3 (MAPK3 (1B))            | ACCACATTCAGGTATCTTGGGT      | GATGCGCTGTTTGGGTTGAA        |
| Mitogen-activated protein kinase kinase kinase 1 (MAP4K1)  | CTCACAGCTCGCTCAGATCC        | GAGGGGACAGCCGTTGAAT         |
| Melan-a (MLANA)                                            | TGGATACAGAACCCTTGATGGACA    | GGGCTGATGGGATTTCTCTTG       |
| MMP9                                                       | AAACCACCTCTCCCGACTCCAG      | AGCTCGGTGGTGTCTCCAATG       |
| MMP13                                                      | ACCTCCACAGTTGACAGGGT        | AGGCATCCACATCTTGTTT         |
| OPN                                                        | ATCTCACCATTCGGATGAGTCT      | TCAGTCCATAAGCCAAGTATCA      |
| PAI1                                                       | GTGCATCACTCCACAAACCTGC      | TAACGTGGGTTGCCAAGCATC       |
| PDGF $\alpha$                                              | CGCTGCACTGGCTGTTGTA         | TTCCCTACGCTTCTGTCTC         |
| PDGF $\beta$                                               | CGAGCCAAGACGCCTCAAG         | CATGGGTGTGCTTAAACTTTCG      |
| Platelet and Endothelial Cell Adhesion Molecule 1 (PECAM1) | TGCACCCATCACTTACCACC        | TAAAACGCGGTCTGTTCCTC        |
| PPAR $\alpha$                                              | TCGGCGAACTATTCGGCTG         | GCACTTGTGAAAACGGCAGT        |
| PPAR $\beta/\delta$                                        | TTGAGCCCAAGTTCGAGTTTG       | CGGTCTCCACACAGAATGATG       |
| PPAR $\gamma$                                              | TGTGGGGATAAAGCATCAGGC       | CCGGCAGTTAAGATCACACCTAT     |
| Ras homolog gene family, member A (RHOA)                   | AGCCTTCTCACCTGGACTGC        | CACCCACTGCCACCCATAAG        |
| Rpl27                                                      | CAAGGGGATATCCACAGAGTACCTT   | CTGGTGGCTGGAATTGACCGCTA     |
| SKI-like oncogene (SKIL)                                   | AGGCAGAGACAAGTAAGTCCA       | CGTCTGGGTAAGACACTGTTTTT     |
| SMAD3                                                      | CCCCACTGGATGACTACAG         | TCCATCTTCACTCAGGTAGCC       |
| SOCS1                                                      | CTGGCGCTTCTATTGGGGAC        | AAAAGGCAGTCCGAAGGTCTCG      |
| SOCS3                                                      | CAAGAACCTACGCATCCAGTG       | CCAGCTTGAGTACACAGTCCGAA     |
| SPARC                                                      | ACTACATCGGACCATGCAAATAC     | GTACAAGGTGACCAGGACATTTT     |
| STAT1                                                      | GGAGCAGCTGCCATGATG          | CTCCAGAGAAAAAGCGGTGTA       |
| STAT3                                                      | CAATACCATTGACCTGCCGAT       | GAGCAGCTCAACTGCCCT          |
| STAT5A                                                     | AGTGGTTCGACGGGGTGAT         | ATGGCTTCAGATTCCAGAGGT       |
| TGF $\alpha$                                               | CACTCTGGGTACGTGGGTG         | CACAGGTGATAATGAGGACAGC      |
| TGF $\beta$ 1                                              | CCGCAACAACGCCATCTATG        | CTCTGCACGGGACAGCAAT         |
| TGF $\beta$ 2                                              | TCGACATGGATCAGTTTATGCG      | CCCTGGTACTGTTGATAGTGA       |
| TGF $\beta$ receptor 1 (TGF $\beta$ R1)                    | TCCCAACTCAGGACCTTTTTCA      | GCAGTGGTAAACTGTATCCAGA      |
| TIMP1                                                      | CTTGGTTCCTGGCGTACTC         | ACCTGATCCGTCCACAAACAG       |
| TIMP2                                                      | CTGGACGTTGGAGGAAAGAAG       | GGTGATGCTAAGCGTGTCCC        |

|                                                                                |                                    |                                    |
|--------------------------------------------------------------------------------|------------------------------------|------------------------------------|
| TIMP3                                                                          | GCGCAAGGGCCTCAATTAC                | AGAGACACTCATTCTTGGAGGT             |
| TLR2                                                                           | CCAGACACTGGGGGTAACATC              | CGGATCGACTTTAGACTTTGGG             |
| TLR4                                                                           | AAAGTGGCCCTACCAAGTCTC              | TCAGGCTGTTTGTCCCAAATC              |
| TNC                                                                            | GCTACCGACGGGATCTTCG                | TAGCCGTGGTACTGATGGTTT              |
| TNF $\alpha$                                                                   | GGCTTTCCGAATTCACCTGGAG             | CCCCGGCCTCCAAATAAA                 |
| TNF $\alpha$ interacting protein 2 (TNF $\alpha$ IP2)                          | AAAGGGATACCTACTTGCTGCT             | CAAGCCCGACACCTTGAAG                |
| TSP-1                                                                          | GAAGCAACAAGTGGTGTGTCAGT            | ACAGTCTATGTAGAGTTGAGCCC            |
| VEGFA                                                                          | GCACATAGAGAGAATGAGCTTCC            | CTCCGCTCTGAACAAGGCT                |
| VG1 related sequence (VGR)                                                     | TCCTTGAACCGCAAGAGTCTC              | CTCACCTCAGGAATCTGGG                |
| VHL                                                                            | AAAGAGCGGTGCCTTCAGG                | CACTTGGGTAGTCCTCAAATC              |
| X-ray repair complementing defective repair in Chinese hamster cells 1 (XRCC1) | TCTTCAGTCGTATCAACAAGACG            | GTTTGCTGGGAGGTTTCCTG               |
| ID3                                                                            |                                    |                                    |
| <b>Primers for ChIP</b>                                                        | <b>Forward Sequence (5' to 3')</b> | <b>Reverse Sequence (5' to 3')</b> |
| STAT binding site                                                              | CATGCGAAGATGAGTGGACC               | CCAATAAAGCATTCACACATGG             |
| Control                                                                        | AGCCCTGGACCTGCTGATAGAG             | AATGAGGACCACGGTGGCAC               |
