# Supplementary material
Source: PubMed Central journal article supplement (PMC4435481)
Supplement: mt2014102x11.pdf [file mt2014102x11.pdf]

**Table S2. Gene expression in ob/+ wound**

| <b>GenBank Accession No.</b> | <b>Symbol</b>       | <b>Day 0</b> | <b>Day 3</b> | <b>Day 5</b> | <b>Day 7</b> | <b>Day 10</b> |
|------------------------------|---------------------|--------------|--------------|--------------|--------------|---------------|
| <b>PROLIFERATION</b>         |                     |              |              |              |              |               |
| NM_008416                    | JUN-B               | 0.156725     | 6.554231     | 0.686169     | 0.588833     | 0.740001      |
| NM_008108                    | GDF3                | 0.229432     | 6.458987     | 2.496683     | 1.688878     | 1.227741      |
| NM_001033239                 | CSTA                | 0.188826     | 4.410111     | 19.62685     | 8.619888     | 4.364321      |
| NM_011577.1                  | TGFB1               | 0.208501     | 2.552748     | 0.930714     | 0.573895     | 0.537032      |
| NM_009532                    | XRCC1               | 0.409888     | 4.198295     | 1.129176     | 0.977582     | 2.504406      |
| NM_001081117.2               | Ki67                | 0.588614     | 5.438939     | 2.334188     | 2.623753     | 3.532172      |
| NM_008037                    | FOSL2 (FRA2)        | 0.304307     | 2.714392     | 0.578645     | 1.197301     | 1.043532      |
| NM_011386.2                  | SKIL (SnoN)         | 0.933885     | 6.077622     | 5.291099     | 2.839864     | 2.465658      |
| NM_009652.3                  | AKT1                | 0.594666     | 3.446702     | 1.482059     | 1.238363     | 0.856369      |
| NM_010427.4                  | HGF                 | 0.291696     | 1.172812     | 1.299929     | 0.499510     | 0.523416      |
| NM_011952                    | MAPK3 (1b)          | 0.351700     | 1.105140     | 0.604718     | 0.490997     | 0.420572      |
| NM_009870                    | CDK4                | 0.637520     | 1.941299     | 1.289818     | 1.329348     | 1.012852      |
| NM_009896                    | SOCS1               | 0.751820     | 2.015070     | 2.614084     | 0.911380     | 1.054464      |
| NM_008008.4                  | KGF (FGF7)          | 0.514706     | 1.121522     | 0.805334     | 0.382475     | 0.653387      |
| NM_031199.3                  | TGFA                | 1.109040     | 1.833541     | 2.902839     | 2.059449     | 1.384412      |
| NM_007670.4                  | p15 (CDKN2B)        | 0.868720     | 1.674337     | 1.066530     | 0.908250     | 2.178165      |
| AF016189.1                   | Smad3               | 0.661817     | 1.268314     | 1.040053     | 0.544876     | 0.578266      |
| NM_008006.2                  | FGF2                | 0.424226     | 0.758342     | 0.404547     | 0.205858     | 0.116904      |
| NM_009283                    | STAT 1              | 0.762617     | 1.081457     | 1.543661     | 0.645053     | 0.284173      |
| NM_008279.2                  | MAP4K1              | 0.520385     | 0.904445     | 1.013113     | 0.508003     | 0.336498      |
| NM_207655                    | EGFR                | 0.664681     | 1.006642     | 0.765933     | 0.649277     | 1.052040      |
| NM_011145.3                  | PPAR $\beta/\delta$ | 0.858071     | 0.412738     | 1.301343     | 0.497965     | 0.009220      |
| NM_007987.2                  | FAS                 | 0.208006     | 0.226172     | 0.034424     | 0.294469     | 0.434092      |
| NM_009370.2                  | TGFBR1 (ALK5)       | 0.968227     | 0.932627     | 0.914630     | 0.872759     | 1.227945      |
| NM_010927.3                  | iNOS (NOS2)         | 0.367154     | 0.203582     | 1.026928     | 0.830821     | 0.697027      |
| NM_009969.4                  | GM-CSF              | 1.305664     | 2.057592     | 2.319032     | 0.914727     | 1.289411      |
| NM_011144.6                  | PPAR $\alpha$       | 1.376648     | 0.632694     | 0.504220     | 0.400709     | 0.522342      |
| <b>ANGIOGENESIS</b>          |                     |              |              |              |              |               |
| NM_007426.3                  | ANGPT2              | 0.110251     | 0.611290     | 1.771250     | 0.254272     | 0.542262      |
| NM_009505                    | VEGFA               | 1.256536     | 4.690086     | 2.205454     | 0.880261     | 1.104457      |
| BC003806                     | STAT 3              | 0.704101     | 1.526852     | 1.145983     | 0.678334     | 0.527540      |
| NM_011057.3                  | PDGFB               | 0.938039     | 1.825587     | 1.793180     | 0.767349     | 0.703514      |
| AF016189.1                   | Smad3               | 0.661817     | 1.268314     | 1.040053     | 0.544876     | 0.578266      |
| NM_008808.3                  | PDGFA               | 1.034881     | 1.018791     | 2.165501     | 1.084197     | 0.596449      |
| NM_009370.2                  | TGFBR1 (ALK5)       | 0.968227     | 0.932627     | 0.914630     | 0.872759     | 1.227945      |
| NM_009640.3                  | ANGPT1              | 0.312981     | 0.223352     | 0.185313     | 0.106564     | 0.354713      |
| NM_010197.3                  | FGF1                | 1.506516     | 0.845095     | 0.630055     | 0.433178     | 0.586736      |
| NM_010927.3                  | iNOS (NOS2)         | 0.367154     | 0.203582     | 1.026928     | 0.830821     | 0.697027      |
| NM_008816.2                  | PECAM1              | 1.588275     | 0.808740     | 0.777321     | 0.556189     | 0.528869      |
| NM_009605                    | Adipoq              | 0.257089     | 0.063623     | 0.025200     | 0.058030     | 0.196103      |

**MIGRATION**

|                |               |          |          |          |          |          |
|----------------|---------------|----------|----------|----------|----------|----------|
| NM_010140      | EPHA3         | 0.171504 | 1.410735 | 1.281664 | 0.973647 | 0.495663 |
| NM_011952      | MAPK3 (1b)    | 0.351700 | 1.105140 | 0.604718 | 0.490997 | 0.420572 |
| BC003806       | STAT 3        | 0.704101 | 1.526852 | 1.145983 | 0.678334 | 0.527540 |
| NM_008036      | FOSB          | 0.844083 | 1.618836 | 0.867265 | 0.668838 | 0.237066 |
| NM_008402      | ITGAV         | 0.846653 | 1.623685 | 1.197204 | 0.841523 | 1.464738 |
| AF016189.1     | Smad3         | 0.661817 | 1.268314 | 1.040053 | 0.544876 | 0.578266 |
| NM_010143      | EPHB3         | 0.529828 | 0.904733 | 1.098044 | 1.000996 | 1.697639 |
| NM_008279.2    | MAP4K1        | 0.520385 | 0.904445 | 1.013113 | 0.508003 | 0.336498 |
| NM_016802      | RHOA          | 0.981261 | 0.993775 | 0.959051 | 0.838295 | 0.292791 |
| NM_009370.2    | TGFBR1 (ALK5) | 0.968227 | 0.932627 | 0.914630 | 0.872759 | 1.227945 |
| NM_009396.2    | TNFAIP2       | 0.906535 | 0.835809 | 0.654888 | 0.223550 | 0.280186 |
| NM_001127330.1 | PPAR $\gamma$ | 1.202532 | 0.414603 | 0.380897 | 0.343301 | 0.282584 |

**ECM**

|             |                 |          |          |          |          |          |
|-------------|-----------------|----------|----------|----------|----------|----------|
| NM_011593   | TIMP1           | 0.097499 | 4.779940 | 0.615597 | 0.958408 | 0.450441 |
| NM_009263   | OPN (Spp1)      | 0.159337 | 3.386260 | 4.407381 | 0.672715 | 0.059469 |
| NM_011607   | TNC             | 0.338232 | 4.641325 | 7.723610 | 5.793988 | 5.375437 |
| NM_013599   | MMP9            | 0.531998 | 4.645245 | 6.016101 | 1.933875 | 0.820979 |
| NM_008607   | MMP13           | 0.232440 | 1.656137 | 0.666829 | 0.157788 | 0.147205 |
| NM_011580   | TSP-1           | 0.476082 | 2.211606 | 1.336181 | 1.194293 | 1.231223 |
| NM_007404   | ADAM9           | 0.395403 | 1.213515 | 0.922171 | 0.342360 | 0.502758 |
| NM_009242   | SPARC           | 0.480204 | 0.790912 | 1.807140 | 1.017414 | 0.620502 |
| NM_011594   | TIMP2           | 0.497669 | 1.036548 | 1.227695 | 0.723035 | 0.989423 |
| NM_011595.2 | TIMP3           | 0.896732 | 0.560416 | 0.344548 | 0.200935 | 0.748156 |
| NM_008871   | PAI1 (Serpine1) | 1.717840 | 0.884620 | 0.889975 | 0.807652 | 0.147766 |
| NM_009367.3 | TGFB2           | 1.284430 | 0.576548 | 0.736159 | 0.456816 | 0.430501 |
| NM_010296.2 | GLI1            | 1.502637 | 0.463211 | 0.562287 | 0.830497 | 0.324001 |

**APOPTOSIS**

|           |        |          |          |          |          |          |
|-----------|--------|----------|----------|----------|----------|----------|
| NM_007464 | IAP2   | 0.665846 | 1.511230 | 1.138860 | 0.771053 | 0.395123 |
| NM_009283 | STAT 1 | 0.762617 | 1.081457 | 1.543661 | 0.645053 | 0.284173 |
| NM_010517 | IGFBP4 | 0.614106 | 0.888844 | 0.794956 | 0.303044 | 0.749203 |

**INFLAMMATION**

|             |        |          |          |          |          |          |
|-------------|--------|----------|----------|----------|----------|----------|
| NM_013693   | TNFA   | 0.037312 | 10.2316  | 0.468858 | 0.422693 | 0.096479 |
| NM_008176   | CXCL1  | 0.083437 | 11.05786 | 0.793785 | 0.764558 | 0.222295 |
| NM_010548.2 | IL-10  | 0.020473 | 1.212068 | 1.264306 | 0.646134 | 0.441396 |
| NM_009141.2 | CXCL5  | 0.149996 | 3.711946 | 0.489938 | 0.408244 | 0.097458 |
| NM_021274.1 | CXCL10 | 0.091558 | 2.402611 | 0.894154 | 0.391871 | 0.335992 |
| NM_011333.3 | CCL2   | 0.086708 | 1.764824 | 1.228643 | 0.346389 | 0.110375 |
| NM_008380   | INHBA  | 0.182848 | 3.492547 | 1.071480 | 0.740565 | 0.810593 |
| NM_007707   | SOCS3  | 0.526876 | 4.127815 | 1.742194 | 0.789632 | 0.430064 |
| NM_011905   | TLR2   | 0.503839 | 2.670658 | 0.809051 | 0.389091 | 0.302130 |
| NM_031168.1 | IL-6   | 0.366964 | 1.705026 | 2.175877 | 0.605557 | 0.571960 |

|             |             |          |          |          |          |          |
|-------------|-------------|----------|----------|----------|----------|----------|
| BC109135    | IL1R1       | 0.496046 | 1.924439 | 1.098497 | 0.653671 | 1.475758 |
| NM_010431   | HIF1A       | 0.752800 | 2.806556 | 1.038764 | 0.756955 | 0.682358 |
| NM_021297   | TLR4        | 0.503916 | 1.382422 | 1.054945 | 0.475487 | 0.424482 |
| NM_008599.4 | CXCL9       | 0.345309 | 0.727598 | 1.372522 | 0.565455 | 0.459662 |
| NM_011488   | STAT 5A     | 0.453144 | 0.918977 | 0.756884 | 0.581519 | 0.459055 |
| NM_009507.3 | VHL         | 1.001643 | 1.742515 | 1.298497 | 0.814256 | 0.597035 |
| NM_009283   | STAT 1      | 0.762617 | 1.081457 | 1.543661 | 0.645053 | 0.284173 |
| NM_008360.1 | IL-18       | 0.366857 | 0.203418 | 1.026099 | 0.830150 | 0.696464 |
| NM_010638   | KLF-9       | 0.685050 | 0.862250 | 0.386243 | 0.336787 | 0.280775 |
| NM_011330.3 | CCL11       | 0.529826 | 0.320064 | 0.593788 | 0.206036 | 0.217236 |
| NM_010927.3 | iNOS (NOS2) | 0.367154 | 0.203582 | 1.026928 | 0.830821 | 0.697027 |

---
