# Supplementary material
Source: PubMed Central journal article supplement (PMC4435481)
Supplement: mt2014102x12.pdf [file mt2014102x12.pdf]

**Table S3. Gene expression in Saline-treated ob/ob wound**

| GenBank Accession No. | Symbol              | Day 0    | Day 3    | Day 5    | Day 7    | Day 10   |
|-----------------------|---------------------|----------|----------|----------|----------|----------|
| <b>PROLIFERATION</b>  |                     |          |          |          |          |          |
| NM_008416             | JUN-B               | 0.152556 | 3.172094 | 1.526778 | 4.484403 | 0.287089 |
| NM_008108             | GDF3                | 0.136515 | 4.965691 | 6.243470 | 3.966791 | 1.550918 |
| NM_001033239          | CSTA                | 0.508856 | 27.13025 | 12.53943 | 23.37949 | 0.406501 |
| NM_011577.1           | TGFB1               | 0.549678 | 1.355657 | 3.658518 | 3.642923 | 0.660413 |
| NM_009532             | XRCC1               | 3.868010 | 0.530499 | 1.031126 | 1.409277 | 1.518873 |
| NM_001081117.2        | Ki67                | 1.853563 | 3.629809 | 4.337301 | 4.743085 | 1.651986 |
| NM_008037             | FOSL2 (FRA2)        | 0.389147 | 1.190892 | 0.566979 | 0.741474 | 0.302783 |
| NM_011386.2           | SKIL (SnoN)         | 2.759996 | 8.323164 | 7.297358 | 9.664507 | 2.415079 |
| NM_009652.3           | AKT1                | 1.134636 | 1.321611 | 2.016966 | 1.711165 | 0.510856 |
| NM_010427.4           | HGF                 | 0.160628 | 1.743398 | 2.166984 | 0.647157 | 0.904471 |
| NM_011952             | MAPK3 (1b)          | 0.597765 | 0.716862 | 0.944315 | 0.734004 | 0.394860 |
| NM_009870             | CDK4                | 0.813738 | 1.337735 | 1.360731 | 1.560888 | 1.018518 |
| NM_009896             | SOCS1               | 1.497767 | 4.148567 | 3.142511 | 2.844695 | 0.437668 |
| NM_008008.4           | KGF (FGF7)          | 0.595196 | 1.110988 | 0.991840 | 0.742551 | 0.623343 |
| NM_031199.3           | TGFA                | 2.332045 | 5.168670 | 4.421783 | 2.873906 | 2.726296 |
| NM_007670.4           | p15 (CDKN2B)        | 1.499122 | 0.705773 | 1.415514 | 1.818516 | 1.478039 |
| AF016189.1            | Smad3               | 0.742435 | 0.750201 | 0.441932 | 0.598625 | 0.186970 |
| NM_008006.2           | FGF2                | 1.317701 | 0.766727 | 0.713610 | 0.360296 | 0.185439 |
| NM_009283             | STAT 1              | 1.007855 | 1.307954 | 2.155304 | 1.825283 | 0.473602 |
| NM_008279.2           | MAP4K1              | 0.278249 | 0.832453 | 0.819214 | 0.807961 | 0.291905 |
| NM_207655             | EGFR                | 1.023921 | 0.713711 | 1.000820 | 0.444678 | 0.714879 |
| NM_011145.3           | PPAR $\beta/\delta$ | 0.514494 | 2.530547 | 2.382542 | 2.280499 | 1.296668 |
| NM_007987.2           | FAS                 | 0.439816 | 0.099373 | 0.224529 | 0.135704 | 0.263693 |
| NM_009370.2           | TGFBR1 (ALK5)       | 2.250052 | 2.189751 | 1.554899 | 1.455078 | 1.831485 |
| NM_010927.3           | iNOS (NOS2)         | 0.102444 | 0.035823 | 0.001465 | 0.000879 | 0.000051 |
| NM_009969.4           | GM-CSF              | 0.532663 | 1.575585 | 0.216542 | 5.371917 | 2.828046 |
| NM_011144.6           | PPAR $\alpha$       | 1.358423 | 0.585544 | 0.716725 | 0.508685 | 0.755341 |
| <b>ANGIOGENESIS</b>   |                     |          |          |          |          |          |
| NM_007426.3           | ANGPT2              | 2.597985 | 0.522414 | 1.412809 | 1.019220 | 0.291111 |
| NM_009505             | VEGFA               | 1.317539 | 1.372430 | 1.666211 | 0.969143 | 0.441270 |
| BC003806              | STAT 3              | 0.838114 | 1.418559 | 0.857724 | 0.339311 | 0.172353 |
| NM_011057.3           | PDGFB               | 0.669607 | 1.105467 | 1.523259 | 2.128962 | 0.947266 |
| AF016189.1            | Smad3               | 0.742435 | 0.750201 | 0.441932 | 0.598625 | 0.186970 |
| NM_008808.3           | PDGFA               | 0.300793 | 0.745053 | 1.267399 | 1.203785 | 0.673345 |
| NM_009370.2           | TGFBR1 (ALK5)       | 2.250052 | 2.189751 | 1.554899 | 1.455078 | 1.831485 |
| NM_009640.3           | ANGPT1              | 0.271623 | 0.541881 | 0.486119 | 0.361020 | 0.208196 |
| NM_010197.3           | FGF1                | 1.809058 | 1.298661 | 1.220293 | 0.873766 | 0.791780 |
| NM_010927.3           | iNOS (NOS2)         | 0.102444 | 0.035823 | 0.001465 | 0.000879 | 0.000051 |

|                     |                 |          |          |          |          |          |
|---------------------|-----------------|----------|----------|----------|----------|----------|
| NM_008816.2         | PECAM1          | 1.026536 | 1.012497 | 1.271402 | 1.030997 | 0.486843 |
| NM_009605           | Adipoq          | 0.525416 | 0.118814 | 0.081237 | 0.043210 | 0.059965 |
| <b>MIGRATION</b>    |                 |          |          |          |          |          |
| NM_010140           | EPHA3           | 0.856996 | 0.323590 | 2.581308 | 0.504820 | 0.444591 |
| NM_011952           | MAPK3 (1b)      | 0.597765 | 0.716862 | 0.944315 | 0.734004 | 0.394860 |
| BC003806            | STAT 3          | 0.838114 | 1.418559 | 0.857724 | 0.339311 | 0.172353 |
| NM_008036           | FOSB            | 0.474459 | 2.473119 | 0.902717 | 1.233993 | 0.129576 |
| NM_008402           | ITGAV           | 1.486966 | 2.218466 | 3.554344 | 2.428998 | 0.618679 |
| AF016189.1          | Smad3           | 0.742435 | 0.750201 | 0.441932 | 0.598625 | 0.186970 |
| NM_010143           | EPHB3           | 0.389309 | 1.173355 | 0.966125 | 0.878085 | 0.871821 |
| NM_008279.2         | MAP4K1          | 0.278249 | 0.832453 | 0.819214 | 0.807961 | 0.291905 |
| NM_016802           | RHOA            | 0.656541 | 1.501634 | 1.183005 | 1.251562 | 0.693547 |
| NM_009370.2         | TGFBR1 (ALK5)   | 2.250052 | 2.189751 | 1.554899 | 1.455078 | 1.831485 |
| NM_009396.2         | TNFAIP2         | 1.334465 | 0.900658 | 0.394656 | 0.916066 | 0.434364 |
| NM_001127330.1      | PPAR $\gamma$   | 1.476165 | 0.923280 | 0.820091 | 0.499319 | 0.464317 |
| <b>ECM</b>          |                 |          |          |          |          |          |
| NM_011593           | TIMP1           | 0.092007 | 0.675698 | 0.641478 | 0.466803 | 0.346310 |
| NM_009263           | OPN (Spp1)      | 0.321897 | 11.29194 | 9.796510 | 6.725629 | 0.642136 |
| NM_011607           | TNC             | 0.196003 | 9.033474 | 22.59936 | 16.33259 | 3.236137 |
| NM_013599           | MMP9            | 0.486960 | 9.389738 | 5.523574 | 11.41316 | 0.324407 |
| NM_008607           | MMP13           | 0.196111 | 1.485535 | 1.072455 | 2.229062 | 0.556222 |
| NM_011580           | TSP-1           | 0.178282 | 2.934585 | 1.655054 | 5.159779 | 0.417450 |
| NM_007404           | ADAM9           | 1.481524 | 1.773434 | 1.590105 | 1.043663 | 0.435286 |
| NM_009242           | SPARC           | 0.766017 | 0.643615 | 1.251748 | 1.260813 | 0.512365 |
| NM_011594           | TIMP2           | 0.615494 | 0.690985 | 1.270724 | 0.802109 | 0.397484 |
| NM_011595.2         | TIMP3           | 1.082271 | 0.327056 | 0.547626 | 0.502637 | 0.409326 |
| NM_008871           | PAI1 (Serpine1) | 0.827940 | 0.504290 | 0.910365 | 2.138120 | 0.777036 |
| NM_009367.3         | TGFB2           | 1.267494 | 1.106269 | 0.693061 | 1.008982 | 0.465939 |
| NM_010296.2         | GLI1            | 0.777933 | 0.523369 | 0.833232 | 0.636208 | 0.621880 |
| <b>APOPTOSIS</b>    |                 |          |          |          |          |          |
| NM_007464           | IAP2            | 0.881733 | 0.995298 | 0.952775 | 1.001650 | 0.451337 |
| NM_009283           | STAT 1          | 1.007855 | 1.307954 | 2.155304 | 1.825283 | 0.473602 |
| NM_010517           | IGFBP4          | 0.847077 | 0.400526 | 1.231736 | 0.543980 | 0.370002 |
| <b>INFLAMMATION</b> |                 |          |          |          |          |          |
| NM_013693           | TNFA            | 0.058466 | 1.534815 | 0.864856 | 6.997037 | 0.097500 |
| NM_008176           | CXCL1           | 0.103358 | 7.129337 | 4.410788 | 6.082674 | 0.036343 |
| NM_010548.2         | IL-10           | 0.297165 | 1.451524 | 1.288575 | 0.515189 | 0.264587 |
| NM_009141.2         | CXCL5           | 0.501839 | 40.88581 | 49.65191 | 5.464767 | 0.372129 |
| NM_021274.1         | CXCL10          | 0.250498 | 1.126345 | 1.284465 | 0.890984 | 0.680621 |
| NM_011333.3         | CCL2            | 0.214683 | 8.392496 | 5.935198 | 1.128045 | 0.200589 |
| NM_008380           | INHBA           | 0.919534 | 2.784224 | 5.537288 | 2.269734 | 1.586482 |
| NM_007707           | SOCS3           | 1.077089 | 5.065714 | 2.008733 | 2.584182 | 0.374945 |

|             |             |          |          |          |          |          |
|-------------|-------------|----------|----------|----------|----------|----------|
| NM_011905   | TLR2        | 0.489705 | 2.922228 | 2.985972 | 3.031845 | 0.281524 |
| NM_031168.1 | IL-6        | 0.195309 | 8.340513 | 5.607855 | 3.060826 | 1.208423 |
| BC109135    | IL1R1       | 0.921124 | 1.726157 | 3.633038 | 1.147471 | 0.455597 |
| NM_010431   | HIF1A       | 0.895448 | 1.387657 | 0.906589 | 0.592514 | 0.778827 |
| NM_021297   | TLR4        | 0.713236 | 2.706313 | 2.601621 | 1.873377 | 0.369483 |
| NM_008599.4 | CXCL9       | 1.157953 | 2.190138 | 2.601004 | 2.702952 | 3.172733 |
| NM_011488   | STAT 5A     | 0.852498 | 0.754894 | 1.008012 | 0.649486 | 0.236424 |
| NM_009507.3 | VHL         | 1.440808 | 2.150269 | 2.576122 | 2.349019 | 0.933073 |
| NM_009283   | STAT 1      | 1.007855 | 1.307954 | 2.155304 | 1.825283 | 0.473602 |
| NM_008360.1 | IL-18       | 0.599095 | 0.486806 | 0.888455 | 0.557822 | 0.345020 |
| NM_010638   | KLF-9       | 1.401337 | 0.431655 | 0.642859 | 0.516679 | 0.310364 |
| NM_011330.3 | CCL11       | 0.969593 | 0.610924 | 0.957601 | 0.370957 | 0.464304 |
| NM_010927.3 | iNOS (NOS2) | 0.102444 | 0.035823 | 0.001465 | 0.000879 | 0.000051 |

---
