# Supplementary material
Source: PubMed Central journal article supplement (PMC4435481)
Supplement: mt2014102x13.pdf [file mt2014102x13.pdf]

**Table S4. Gene expression in cANGPTL4-treated ob/ob wound**

| GenBank Accession No. | Symbol              | Day 0    | Day 3    | Day 5    | Day 7    | Day 10   |
|-----------------------|---------------------|----------|----------|----------|----------|----------|
| <b>PROLIFERATION</b>  |                     |          |          |          |          |          |
| NM_008416             | JUN-B               | 0.152556 | 0.290977 | 0.208893 | 0.766593 | 0.167475 |
| NM_008108             | GDF3                | 0.136515 | 0.846272 | 0.296635 | 2.639181 | 0.218525 |
| NM_001033239          | CSTA                | 0.508856 | 0.436876 | 0.892908 | 1.389773 | 0.808699 |
| NM_011577.1           | TGFB1               | 0.549678 | 1.010338 | 0.871393 | 0.986599 | 0.762965 |
| NM_009532             | XRCC1               | 3.868010 | 1.213521 | 3.451768 | 6.807802 | 1.314453 |
| NM_001081117.2        | Ki67                | 1.853563 | 2.490830 | 1.048289 | 1.563181 | 1.089726 |
| NM_008037             | FOSL2 (FRA2)        | 0.389147 | 0.374920 | 0.292734 | 1.037806 | 0.536654 |
| NM_011386.2           | SKIL (SnoN)         | 2.759996 | 4.644625 | 0.958261 | 0.205126 | 1.329661 |
| NM_009652.3           | AKT1                | 1.134636 | 1.186596 | 2.733216 | 2.781050 | 1.233187 |
| NM_010427.4           | HGF                 | 0.160628 | 0.700922 | 2.321898 | 3.635397 | 0.980706 |
| NM_011952             | MAPK3 (1b)          | 0.597765 | 0.989835 | 0.468527 | 0.504593 | 0.557869 |
| NM_009870             | CDK4                | 0.813738 | 1.063913 | 0.873984 | 0.929762 | 0.879897 |
| NM_009896             | SOCS1               | 1.497767 | 0.871649 | 0.263218 | 2.390392 | 0.576740 |
| NM_008008.4           | KGF (FGF7)          | 0.595196 | 0.771334 | 1.472135 | 0.915021 | 1.124630 |
| NM_031199.3           | TGFA                | 2.332045 | 4.677648 | 3.229010 | 0.035038 | 2.678183 |
| NM_007670.4           | p15 (CDKN2B)        | 1.499122 | 2.126865 | 1.404709 | 0.795709 | 1.176000 |
| AF016189.1            | Smad3               | 0.742435 | 0.462236 | 0.015755 | 0.383951 | 0.649618 |
| NM_008006.2           | FGF2                | 1.317701 | 0.443933 | 2.333738 | 0.177052 | 0.132299 |
| NM_009283             | STAT 1              | 1.007855 | 0.997653 | 0.980602 | 0.980859 | 1.000369 |
| NM_008279.2           | MAP4K1              | 0.278249 | 0.750923 | 0.598703 | 0.496168 | 0.784413 |
| NM_207655             | EGFR                | 1.023921 | 1.435695 | 0.308265 | 0.587702 | 1.157887 |
| NM_011145.3           | PPAR $\beta/\delta$ | 0.514494 | 0.711088 | 15.66685 | 1.811131 | 0.064872 |
| NM_007987.2           | FAS                 | 0.439816 | 0.872716 | 0.952662 | 0.286981 | 0.595842 |
| NM_009370.2           | TGFBR1 (ALK5)       | 2.250052 | 1.049709 | 1.250868 | 21.28802 | 2.680332 |
| NM_010927.3           | iNOS (NOS2)         | 0.232430 | 0.215077 | 0.262108 | 0.834560 | 0.500736 |
| NM_009969.4           | GM-CSF              | 0.532663 | 0.538789 | 0.140713 | 1.251679 | 0.869274 |
| NM_011144.6           | PPAR $\alpha$       | 1.358423 | 0.797189 | 1.360061 | 1.655384 | 1.062509 |
| <b>ANGIOGENESIS</b>   |                     |          |          |          |          |          |
| NM_007426.3           | ANGPT2              | 2.597985 | 0.591592 | 1.246518 | 0.070762 | 0.001531 |
| NM_009505             | VEGFA               | 1.317539 | 0.892290 | 1.269733 | 1.239880 | 0.761824 |
| BC003806              | STAT 3              | 0.838114 | 1.024890 | 0.508845 | 0.824855 | 0.561319 |
| NM_011057.3           | PDGFB               | 0.669607 | 0.862382 | 0.718599 | 2.285251 | 0.846454 |
| AF016189.1            | Smad3               | 0.742435 | 0.462236 | 0.015755 | 0.383951 | 0.649618 |
| NM_008808.3           | PDGFA               | 0.300793 | 0.527603 | 0.540157 | 2.009957 | 0.718748 |
| NM_009370.2           | TGFBR1 (ALK5)       | 2.250052 | 1.049709 | 1.250868 | 21.28802 | 2.680332 |
| NM_009640.3           | ANGPT1              | 0.271623 | 0.523158 | 0.789467 | 0.373875 | 0.353373 |
| NM_010197.3           | FGF1                | 1.809058 | 0.675523 | 0.911098 | 2.808195 | 1.058101 |
| NM_010927.3           | iNOS (NOS2)         | 0.232430 | 0.215077 | 0.262108 | 0.834560 | 0.500736 |

|                     |                 |          |          |          |          |          |
|---------------------|-----------------|----------|----------|----------|----------|----------|
| NM_008816.2         | PECAM1          | 1.026536 | 9.734563 | 40.79655 | 80.68790 | 0.175586 |
| NM_009605           | Adipoq          | 0.525416 | 0.893195 | 1.281693 | 0.295419 | 0.358659 |
| <b>MIGRATION</b>    |                 |          |          |          |          |          |
| NM_010140           | EPHA3           | 0.856996 | 0.988881 | 0.775695 | 1.061996 | 0.677151 |
| NM_011952           | MAPK3 (1b)      | 0.597765 | 0.989835 | 0.468527 | 0.504593 | 0.557869 |
| BC003806            | STAT 3          | 0.838114 | 1.024890 | 0.508845 | 0.824855 | 0.561319 |
| NM_008036           | FOSB            | 0.474459 | 0.444920 | 0.514906 | 0.554858 | 0.313006 |
| NM_008402           | ITGAV           | 1.486966 | 1.653031 | 0.324666 | 0.099062 | 1.032131 |
| AF016189.1          | Smad3           | 0.742435 | 0.462236 | 0.015755 | 0.383951 | 0.649618 |
| NM_010143           | EPHB3           | 0.389309 | 0.401851 | 0.933636 | 3.133712 | 0.720600 |
| NM_008279.2         | MAP4K1          | 0.278249 | 0.750923 | 0.598703 | 0.496168 | 0.784413 |
| NM_016802           | RHOA            | 0.656541 | 0.648247 | 1.623903 | 5.220673 | 0.848715 |
| NM_009370.2         | TGFBR1 (ALK5)   | 2.250052 | 1.049709 | 1.250868 | 21.28802 | 2.680332 |
| NM_009396.2         | TNFAIP2         | 1.334465 | 0.831268 | 0.974859 | 1.426047 | 0.863158 |
| NM_001127330.1      | PPAR $\gamma$   | 1.476165 | 5.312032 | 0.077685 | 0.085928 | 1.257537 |
| <b>ECM</b>          |                 |          |          |          |          |          |
| NM_011593           | TIMP1           | 0.092007 | 0.428043 | 0.322566 | 0.423165 | 0.171270 |
| NM_009263           | OPN (Spp1)      | 0.321897 | 0.338047 | 0.659040 | 0.730737 | 0.434753 |
| NM_011607           | TNC             | 0.196003 | 0.688293 | 0.605825 | 1.365889 | 0.858515 |
| NM_013599           | MMP9            | 0.486960 | 0.325888 | 0.769769 | 1.277531 | 0.611197 |
| NM_008607           | MMP13           | 0.196111 | 0.242981 | 0.258511 | 1.746660 | 0.218456 |
| NM_011580           | TSP-1           | 0.178282 | 0.682218 | 0.493199 | 2.000362 | 0.278808 |
| NM_007404           | ADAM9           | 1.481524 | 2.147589 | 0.467171 | 2.137471 | 11.81901 |
| NM_009242           | SPARC           | 0.766017 | 0.957468 | 0.796479 | 0.809897 | 0.692813 |
| NM_011594           | TIMP2           | 0.615494 | 0.972705 | 1.119709 | 0.942139 | 0.439807 |
| NM_011595.2         | TIMP3           | 1.082271 | 0.877912 | 0.952572 | 1.509514 | 2.262474 |
| NM_008871           | PAI1 (Serpine1) | 0.827940 | 0.504427 | 0.910143 | 1.296887 | 0.629588 |
| NM_009367.3         | TGFB2           | 1.267494 | 1.179050 | 0.774397 | 1.370055 | 0.683359 |
| NM_010296.2         | GLI1            | 0.777933 | 2.061107 | 0.423950 | 0.490343 | 1.332113 |
| <b>APOPTOSIS</b>    |                 |          |          |          |          |          |
| NM_007464           | IAP2            | 0.881733 | 0.888382 | 1.288717 | 1.131918 | 0.734564 |
| NM_009283           | STAT 1          | 1.007855 | 0.997653 | 0.980602 | 0.980859 | 1.000369 |
| NM_010517           | IGFBP4          | 0.847077 | 1.034808 | 0.868898 | 0.782863 | 0.960491 |
| <b>INFLAMMATION</b> |                 |          |          |          |          |          |
| NM_013693           | TNFA            | 0.058466 | 0.293317 | 0.079136 | 0.504884 | 0.132312 |
| NM_008176           | CXCL1           | 0.103358 | 0.353159 | 0.165312 | 0.652480 | 0.127210 |
| NM_010548.2         | IL-10           | 0.297165 | 0.909327 | 0.899593 | 0.829194 | 0.320147 |
| NM_009141.2         | CXCL5           | 0.501839 | 0.501839 | 0.585031 | 0.997935 | 0.266491 |
| NM_021274.1         | CXCL10          | 0.250498 | 0.685454 | 0.563339 | 1.024823 | 0.476465 |
| NM_011333.3         | CCL2            | 0.214683 | 0.705153 | 0.839760 | 0.526328 | 0.290852 |
| NM_008380           | INHBA           | 0.919534 | 0.912952 | 0.866716 | 0.977302 | 0.924911 |
| NM_007707           | SOCS3           | 1.077089 | 1.087759 | 1.090964 | 0.963710 | 1.126733 |

|             |             |          |          |          |          |          |
|-------------|-------------|----------|----------|----------|----------|----------|
| NM_011905   | TLR2        | 0.489705 | 0.924216 | 0.755532 | 1.526709 | 0.526428 |
| NM_031168.1 | IL-6        | 0.195309 | 0.224720 | 0.507640 | 0.711335 | 0.196630 |
| BC109135    | IL1R1       | 0.921124 | 0.934476 | 1.074441 | 1.026327 | 0.973915 |
| NM_010431   | HIF1A       | 0.895448 | 1.136411 | 0.792758 | 0.750116 | 1.253959 |
| NM_021297   | TLR4        | 0.713236 | 0.922546 | 1.072581 | 1.115380 | 0.944624 |
| NM_008599.4 | CXCL9       | 1.157953 | 1.052630 | 1.006731 | 0.955921 | 1.009809 |
| NM_011488   | STAT 5A     | 0.852498 | 1.027928 | 0.950384 | 0.832105 | 0.879752 |
| NM_009507.3 | VHL         | 1.440808 | 1.480614 | 0.966011 | 0.768630 | 1.196276 |
| NM_009283   | STAT 1      | 1.007855 | 0.997653 | 0.980602 | 0.980859 | 1.000369 |
| NM_008360.1 | IL-18       | 0.599095 | 0.831837 | 1.030033 | 1.007655 | 0.873737 |
| NM_010638   | KLF-9       | 1.401337 | 1.351285 | 0.209858 | 0.106323 | 0.293995 |
| NM_011330.3 | CCL11       | 0.969593 | 1.001181 | 1.038671 | 0.967775 | 0.930282 |
| NM_010927.3 | iNOS (NOS2) | 0.232430 | 0.215077 | 0.262108 | 0.834560 | 0.500736 |
