# Supplementary material
Source: PubMed Central journal article supplement (PMC4435481)

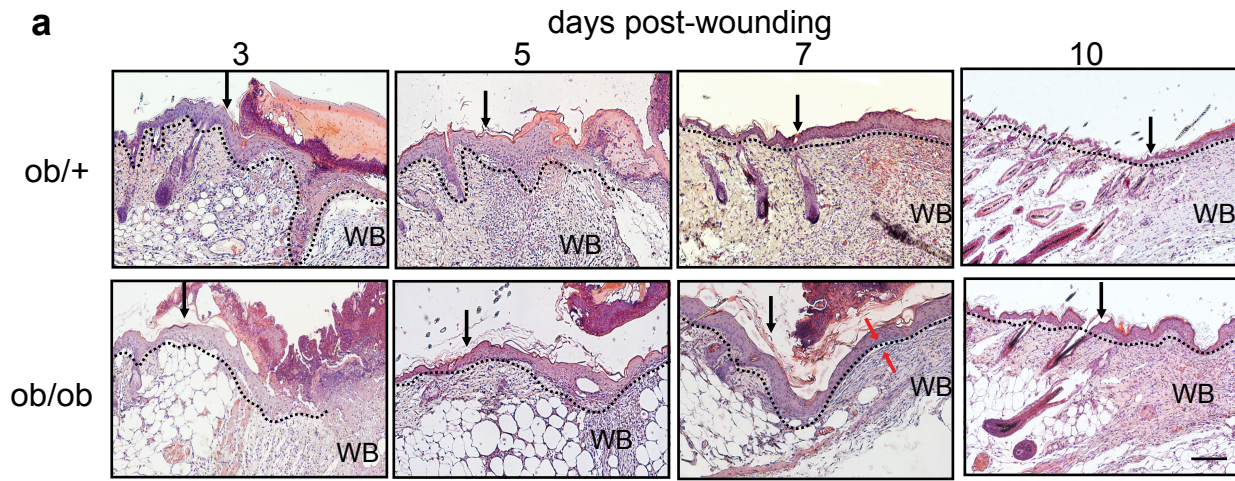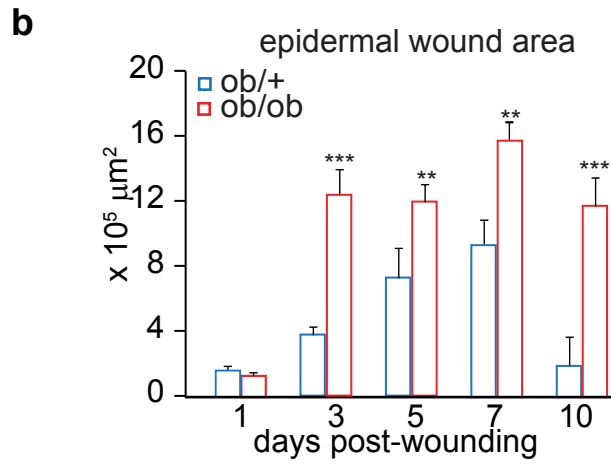

Supplement: mt2014102x1.pdf [file mt2014102x1.pdf]

**a**

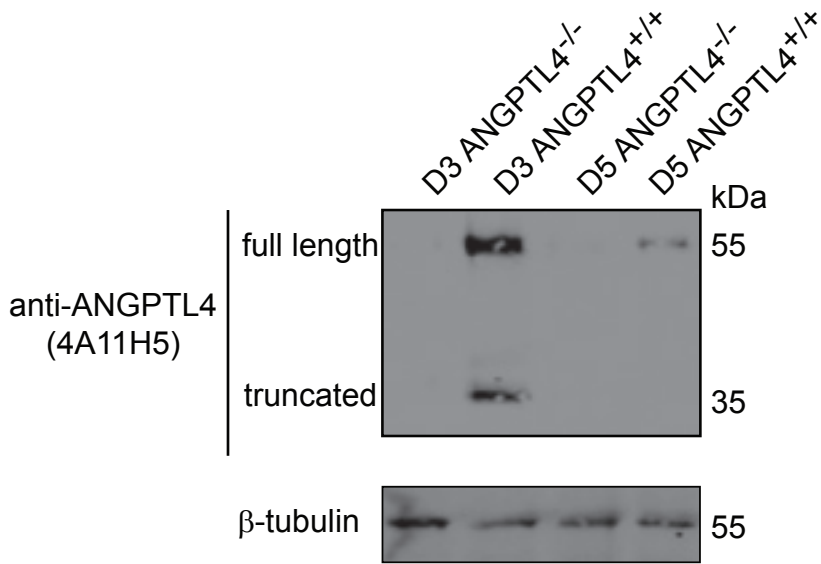

**b**

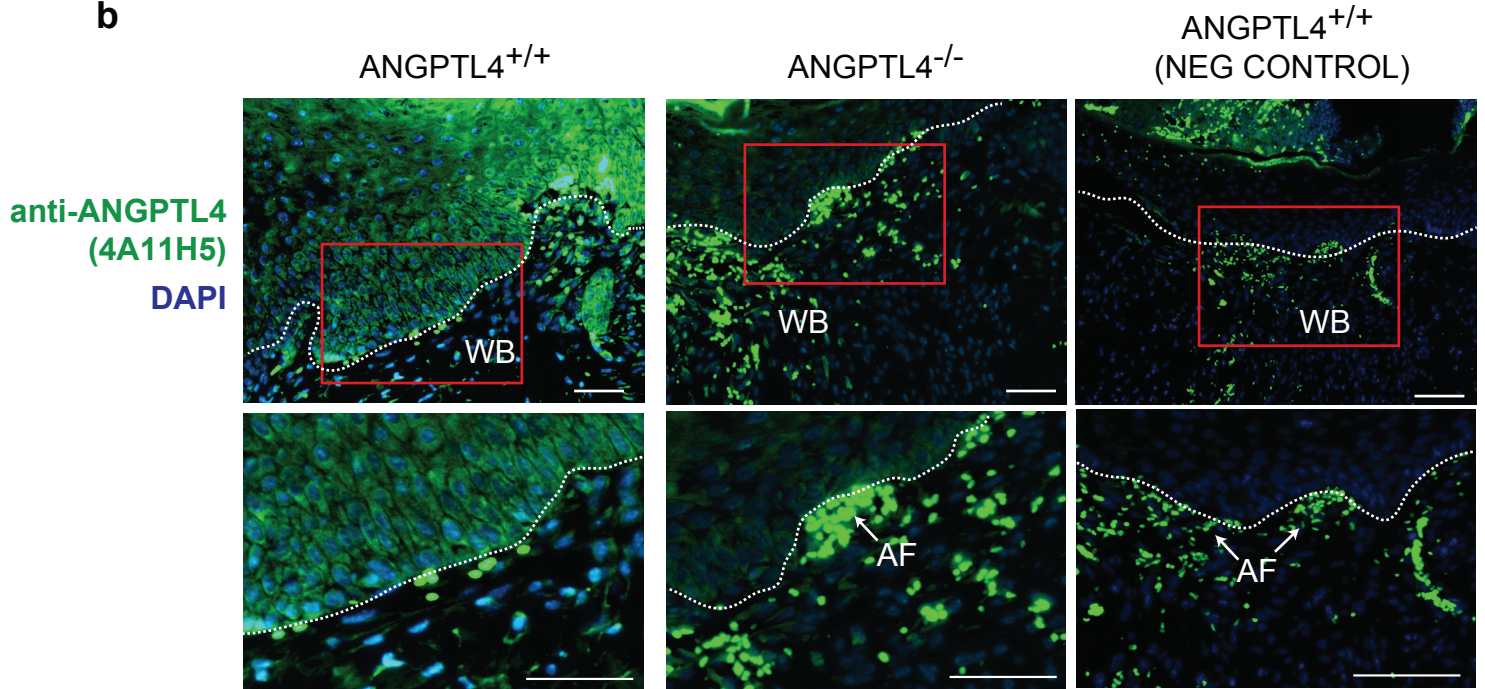

Supplement: mt2014102x2.pdf [file mt2014102x2.pdf]

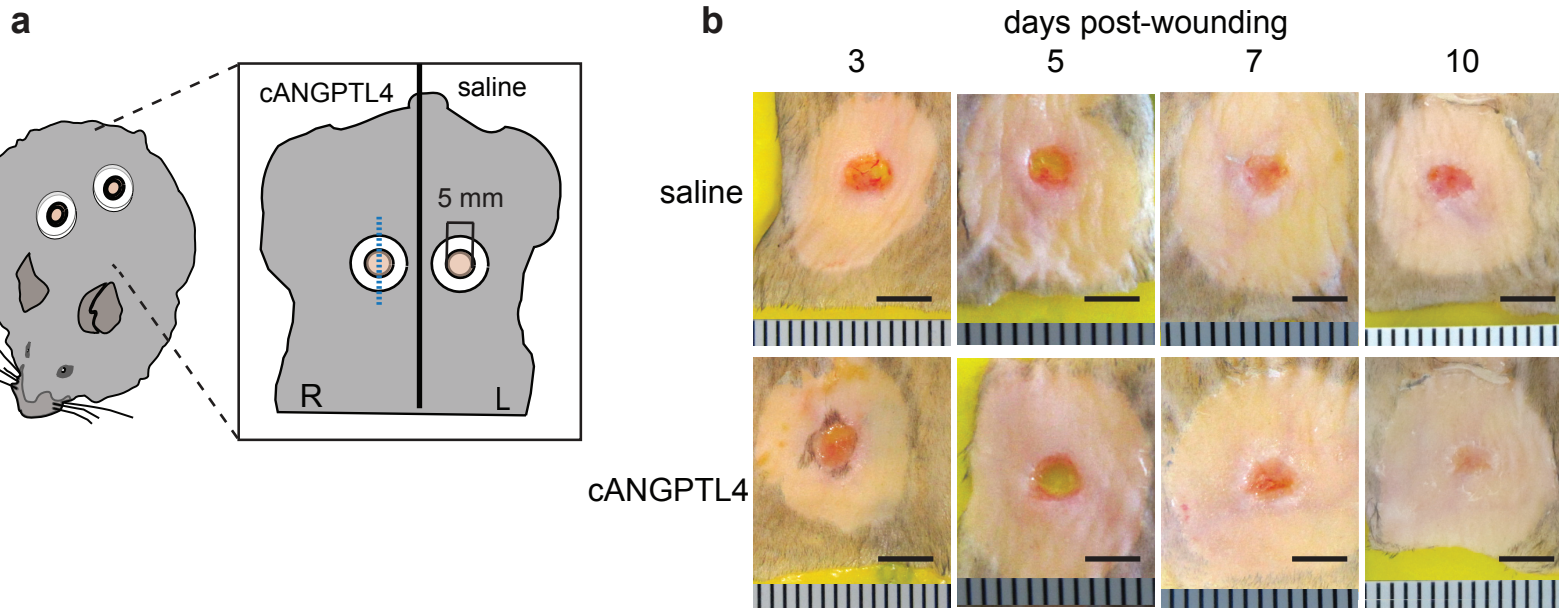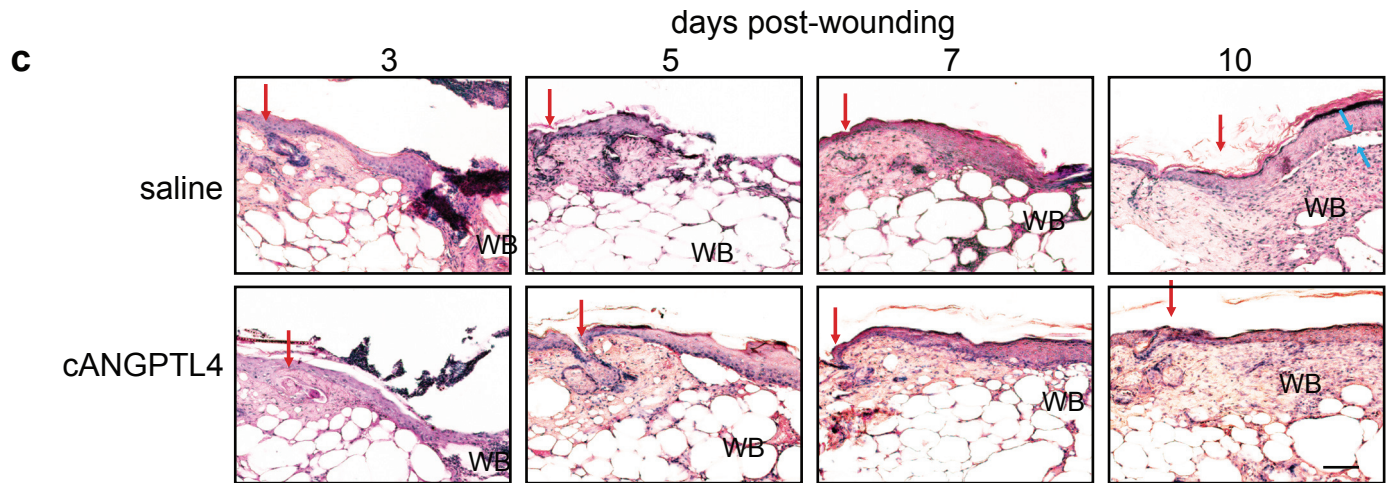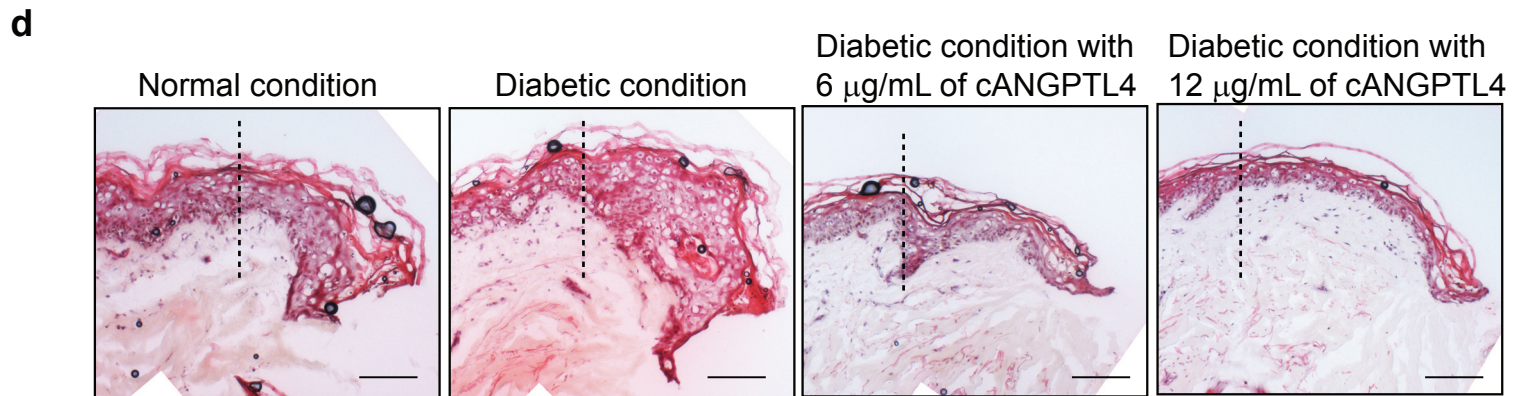

Supplement: mt2014102x3.pdf [file mt2014102x3.pdf]

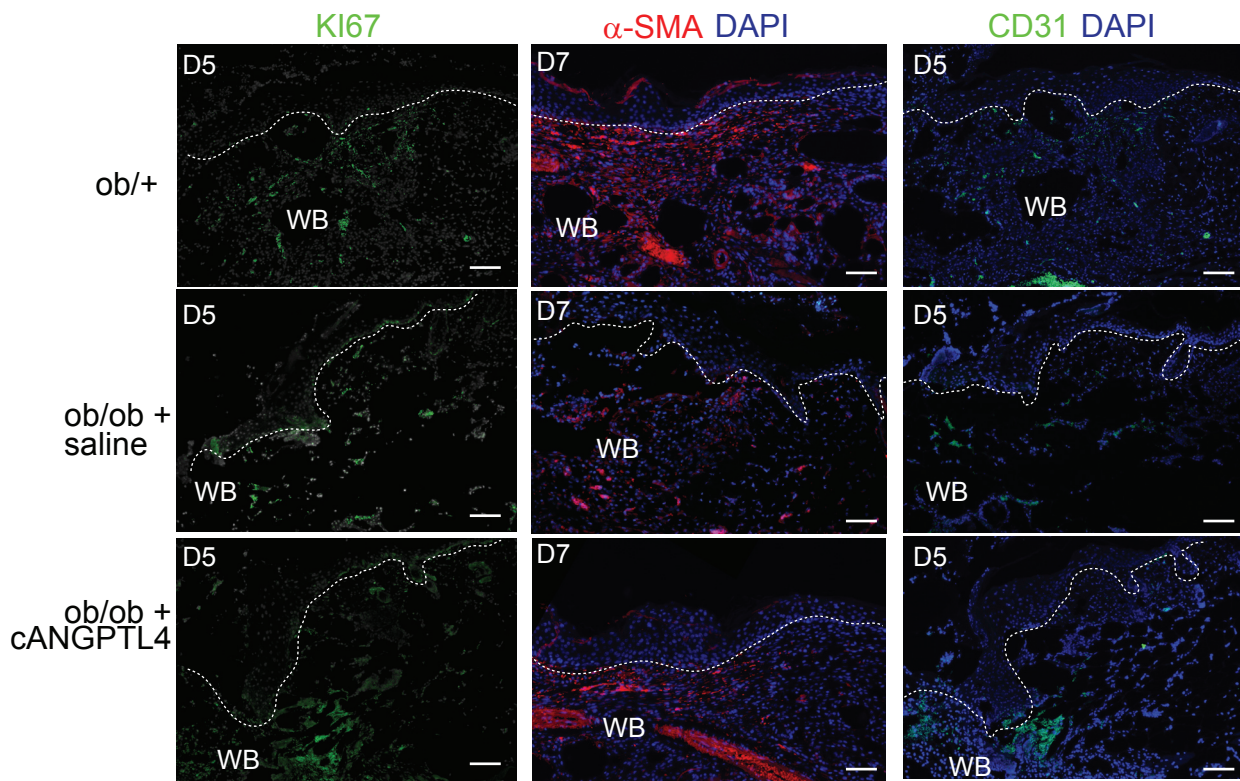

Supplement: mt2014102x4.pdf [file mt2014102x4.pdf]

**a**

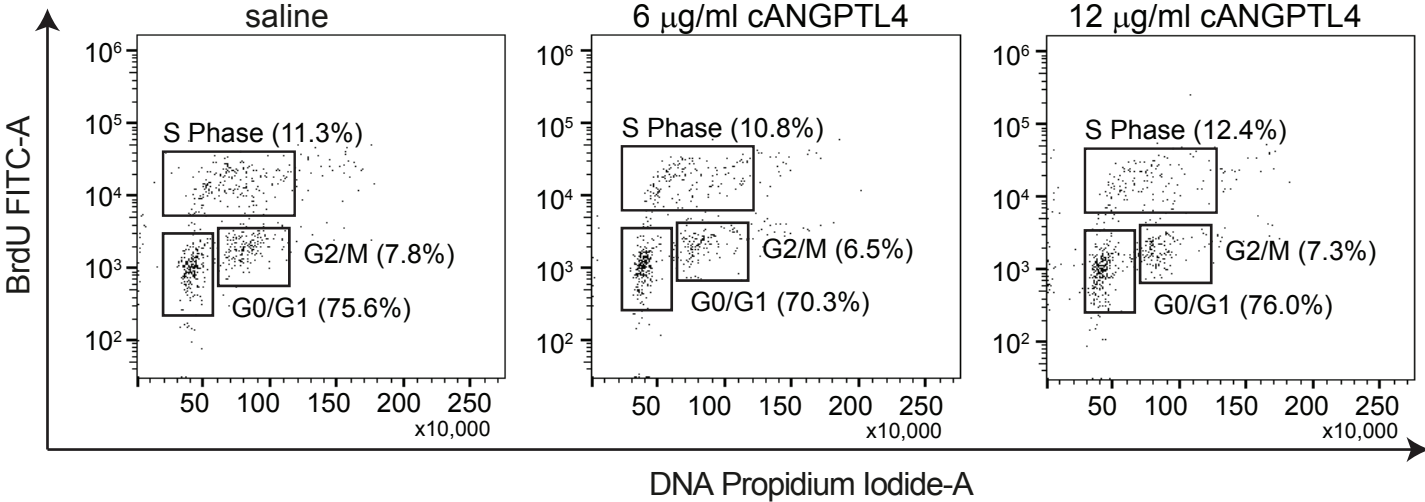

**b**

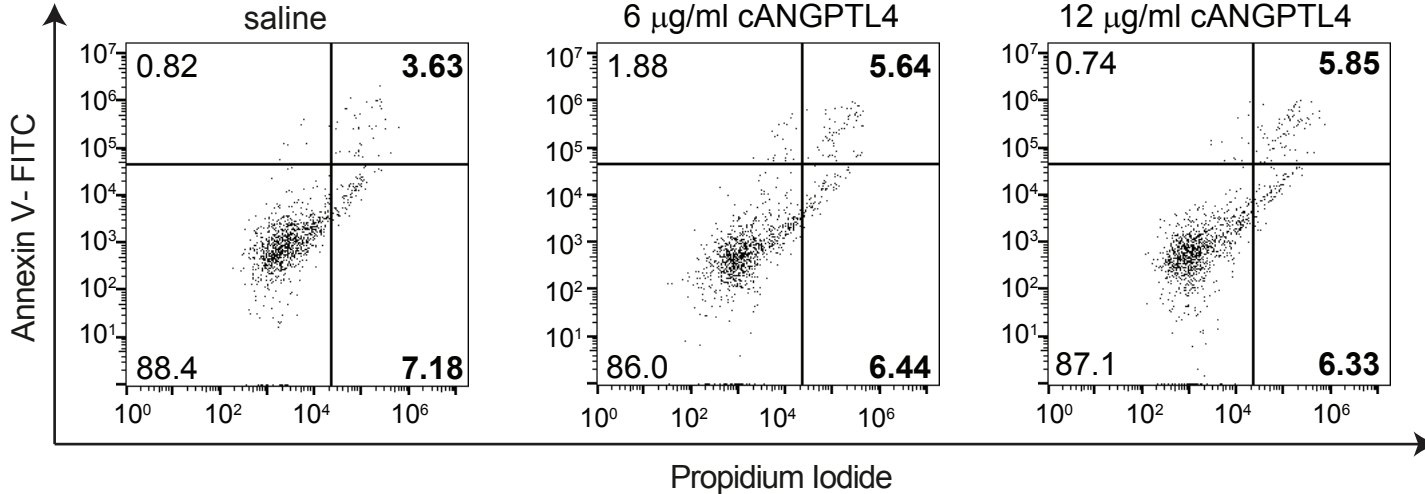

Supplement: mt2014102x5.pdf [file mt2014102x5.pdf]

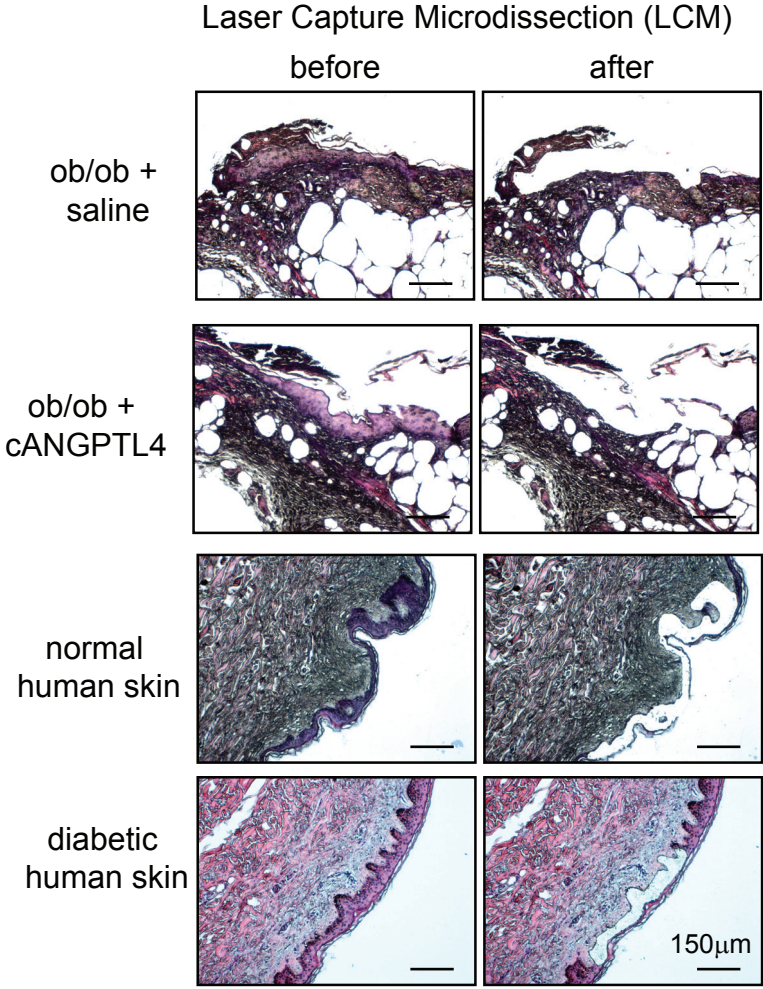

Supplement: mt2014102x6.pdf [file mt2014102x6.pdf]

**a**

Day 7 post-injury ob/ob wounds

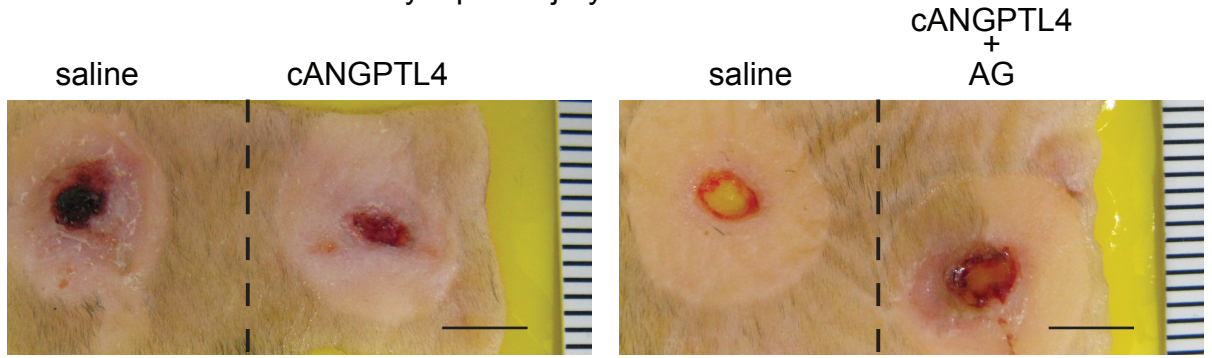

**b**

Day 7 post-injury ob/ob wounds

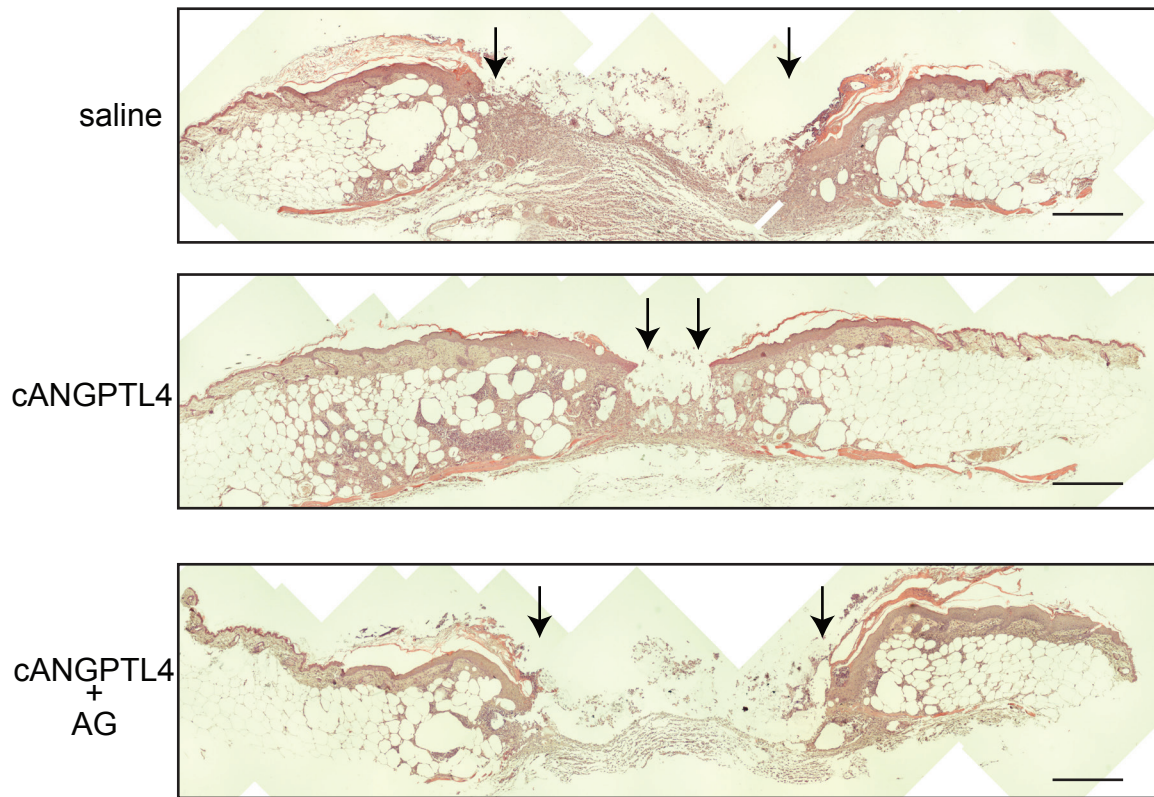

Supplement: mt2014102x7.pdf [file mt2014102x7.pdf]

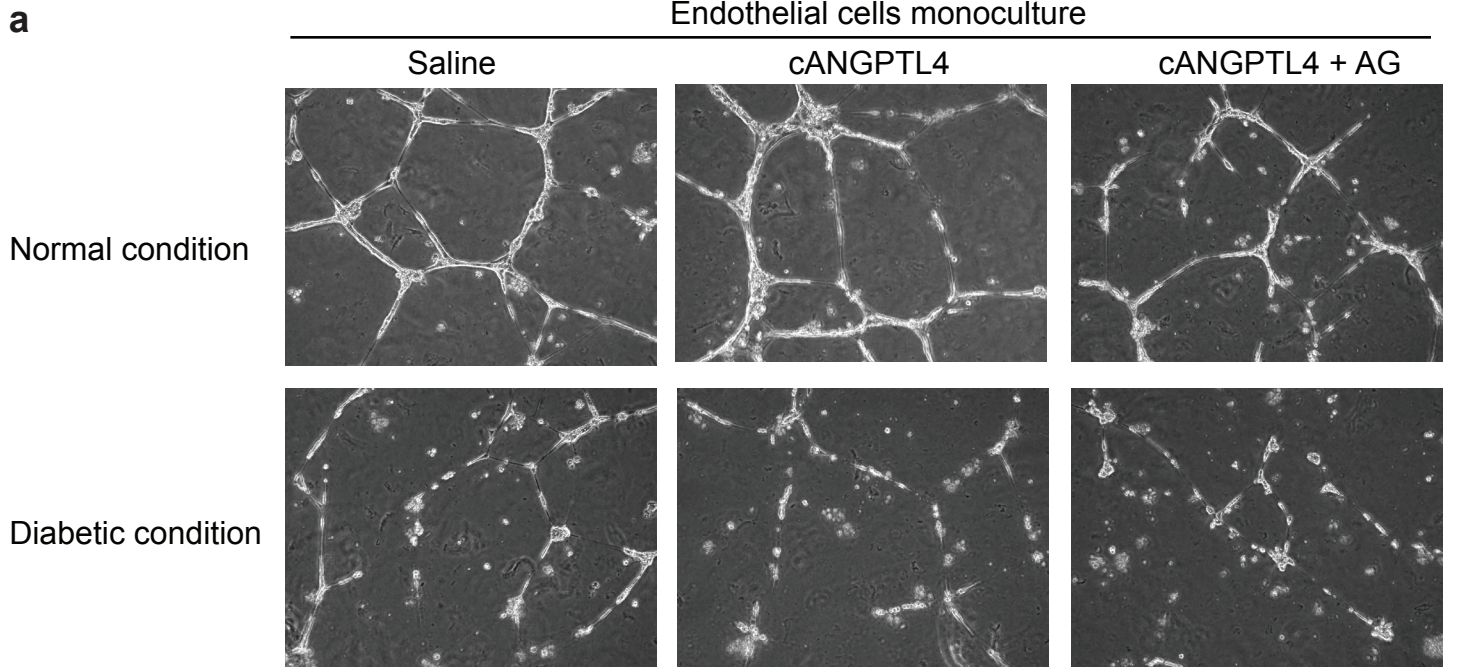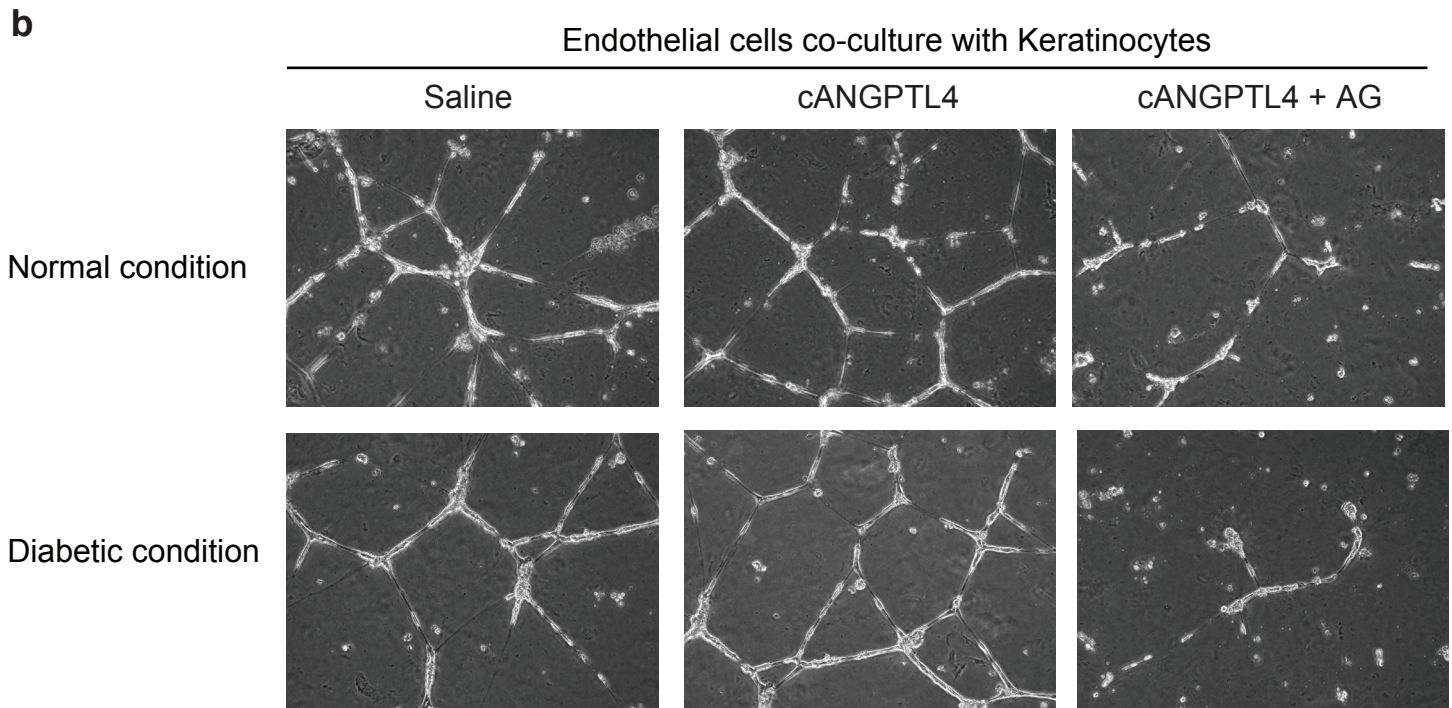

Supplement: mt2014102x8.pdf [file mt2014102x8.pdf]

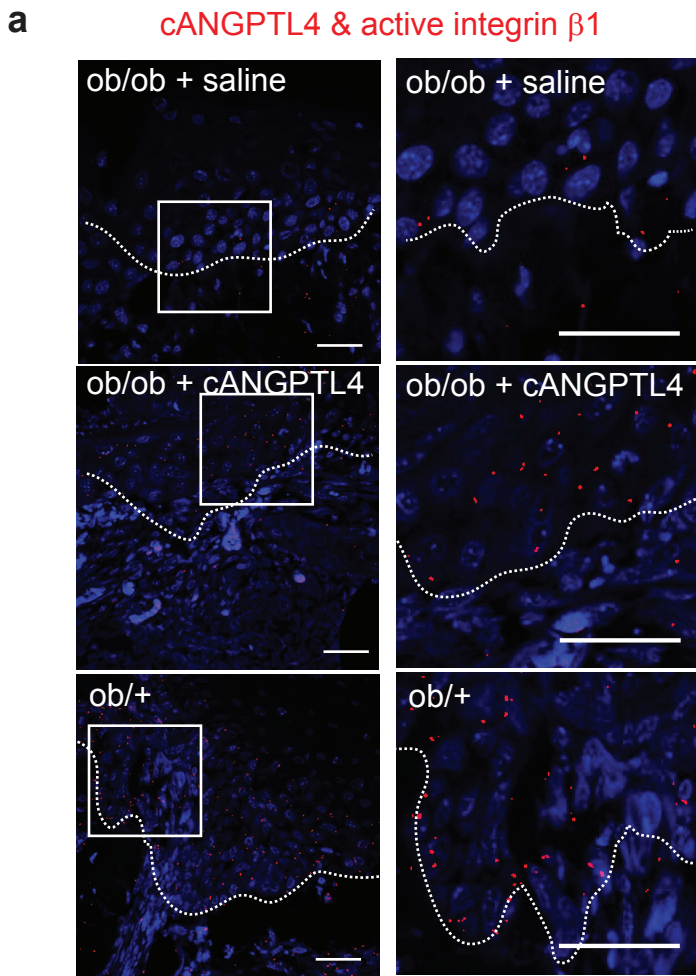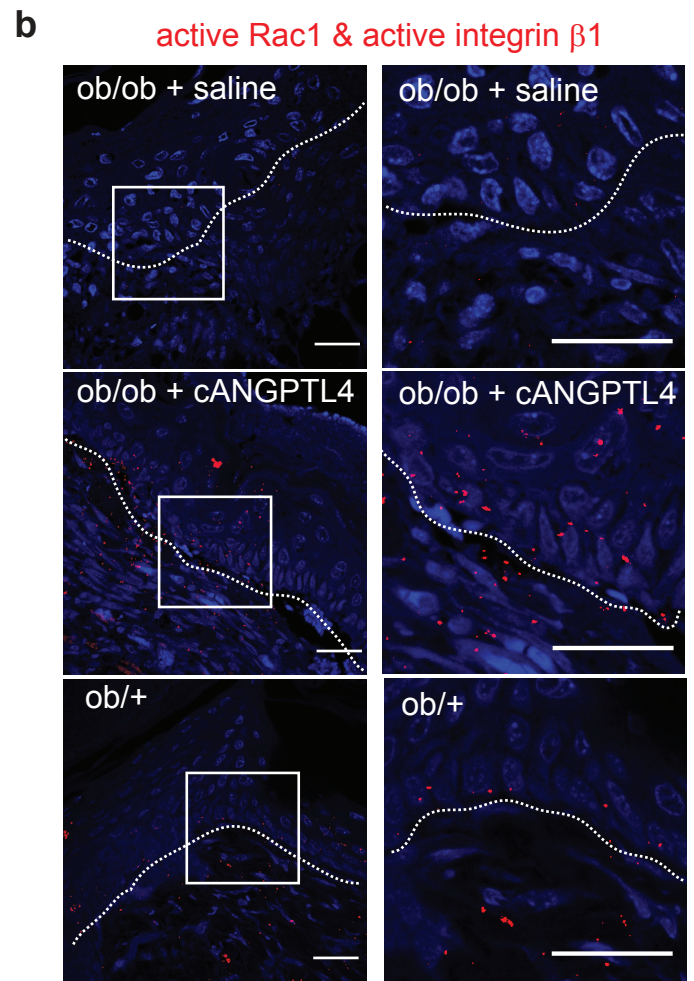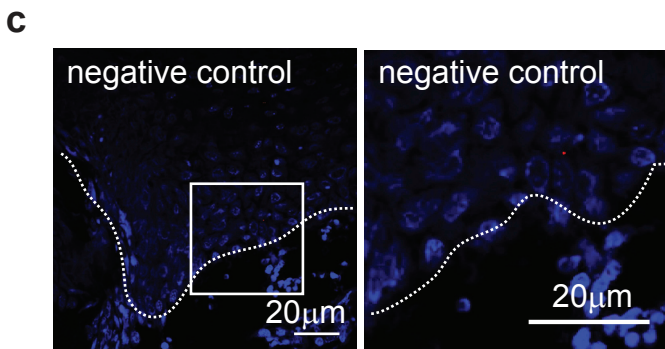

Supplement: mt2014102x9.pdf [file mt2014102x9.pdf]
